# Supplementary material for: Genetic Separation of Listeria monocytogenes Causing Central Nervous System Infections in Animals
Source: Front Cell Infect Microbiol. 2018 Feb 5;8:20. doi: 10.3389/fcimb.2018.00020 (PMC5807335; doi:10.3389/fcimb.2018.00020)
Supplement: Supplementary file 1 [file Table1.XLSX]

## Sheet: Table S1
TableS1. Sequencing data and metada information of the Listeria monocytogenes strains used in the study.
Strain name	Sample accession (Dreyer et al., 2016)	Run accession (Dreyer et al., 2016)	Sample accession (current study)	Run accession (current study)	Sequencing machine	Coverage (JF5203)*	Coverage (JF4839)*	Source	Lineage	ST**	CC**	Country
JF4839			ERS1939672 (SAMEA104314694)	ERR2135529	HiSeq 2000	271.421	303.144	Food	II	9	CC9	Greece
JF4899			ERS1939673 (SAMEA104314695)	ERR2135530	HiSeq 4000	509.986	464.81	Cattle brain	I	1	CC1	Switzerland
JF4901	ERS1299203	ERR1590247	ERS1939674 (SAMEA104314696)	ERR2135531	HiSeq 2000	67.0702	60.3447	Cattle brain	I	1	CC1	Switzerland
JF4902	ERS1299204	ERR1590248	ERS1939675 (SAMEA104314697)	ERR2135532	HiSeq 2000	60.9637	54.2242	Cattle brain	I	1	CC1	Switzerland
JF4904	ERS1299205	ERR1590249	ERS1939676 (SAMEA104314698)	ERR2135533	HiSeq 2000	51.161	45.9225	Cattle brain	I	1	CC1	Switzerland
JF4906	ERS1299206	ERR1590250	ERS1939677 (SAMEA104314699)	ERR2135534	HiSeq 2000	71.1262	63.8501	Cattle brain	I	413	CC1	Switzerland
JF4907	ERS1299207	ERR1590251	ERS1939678 (SAMEA104314700)	ERR2135535	HiSeq 2000	48.4961	44.3207	Cattle brain	I	4	CC4	Switzerland
JF4908	ERS1299208	ERR1590252	ERS1939679 (SAMEA104314701)	ERR2135536	HiSeq 2000	76.0032	68.0365	Cattle brain	I	1	CC1	Switzerland
JF4909	ERS1299209	ERR1590253	ERS1939680 (SAMEA104314702)	ERR2135537	HiSeq 4000	496.457	453.662	Cattle brain	I	1	CC1	Switzerland
JF4913			ERS1939681 (SAMEA104314703)	ERR2135538	HiSeq 4000	452.173	470.736	Cattle brain	II	412	CC412	Switzerland
JF4914			ERS1939682 (SAMEA104314704)	ERR2135539	HiSeq 4000	470.672	482.423	Goat brain	II	20	CC20	Switzerland
JF4918			ERS1939683 (SAMEA104314705)	ERR2135540	HiSeq 4000	488.945	446.982	Goat brain	I	1	CC1	Switzerland
JF4920			ERS1939684 (SAMEA104314706)	ERR2135541	HiSeq 3000	36.31	37.1365	Goat brain	II	200	ST200	Switzerland
JF4927	ERS1299210	ERR1590254	ERS1939685 (SAMEA104314707)	ERR2135542	HiSeq 2000	119.722	107.629	Goat brain	I	1	CC1	Switzerland
JF4929			ERS1939686 (SAMEA104314708)	ERR2135543	HiSeq 4000	492.895	457.145	Sheep brain	I	4	CC4	Switzerland
JF4930			ERS1939687 (SAMEA104314709)	ERR2135544	HiSeq 4000	457.213	469.897	Sheep brain	II	206	CC14	Switzerland
JF4931			ERS1939688 (SAMEA104314710)	ERR2135545	HiSeq 3000	275.128	285.862	Sheep brain	II	415	CC415	Switzerland
JF4934	ERS1299211	ERR1590255	ERS1939689 (SAMEA104314711)	ERR2135546	HiSeq 4000	480.084	437.581	Sheep brain	I	414	CC1	Switzerland
JF4935			ERS1939690 (SAMEA104314712)	ERR2135547	HiSeq 2000	280.364	292.502	Sheep brain	II	412	CC412	Switzerland
JF4936			ERS1939691 (SAMEA104314713)	ERR2135548	HiSeq 3000	300.428	280.012	Sheep brain	I	4	CC4	Switzerland
JF4939			ERS1939692 (SAMEA104314714)	ERR2135549	HiSeq 2000	41.1146	36.9784	Sheep brain	I	1	CC1	Switzerland
JF4941	ERS1324325	ERR1600130	ERS1939693 (SAMEA104314715)	ERR2135550	HiSeq 2000	51.365	53.7734	Sheep brain	II	11	CC11	Switzerland
JF4974	ERS1299212	ERR1590256	ERS1939694 (SAMEA104314716)	ERR2135551	HiSeq 2000	37.7558	34.9702	Cattle abortion	I	220	CC220	United Kingdom
JF4975			ERS1939695 (SAMEA104314717)	ERR2135552	HiSeq 3000	293.086	271.472	Cattle abortion	I	2	CC2	United Kingdom
JF4976			ERS1939696 (SAMEA104314718)	ERR2135553	HiSeq 3000	18.9148	19.7407	Cattle abortion	II	14	CC14	United Kingdom
JF4978	ERS1299213	ERR1590257	ERS1939697 (SAMEA104314719)	ERR2135554	HiSeq 2000	300.534	272.542	Sheep enteritis	I	220	CC220	United Kingdom
JF4981			ERS1939698 (SAMEA104314720)	ERR2135555	HiSeq 3000	280.993	289.938	Sheep abortion	II	20	CC20	United Kingdom
JF4982	ERS1324326	ERR1600131	ERS1939699 (SAMEA104314721)	ERR2135556	HiSeq 2000	110.34	114.907	Sheep enteritis	II	18	CC18	United Kingdom
JF4987			ERS1939700 (SAMEA104314722)	ERR2135557	HiSeq 3000	298.136	278.254	Sheep enteritis	I	220	CC220	United Kingdom
JF4990			ERS1939701 (SAMEA104314723)	ERR2135558	HiSeq 4000	487.679	454.304	Sheep abortion	I	220	CC220	United Kingdom
JF4991			ERS1939702 (SAMEA104314724)	ERR2135559	HiSeq 3000	51.1765	52.463	Sheep abortion	II	403	CC403	United Kingdom
JF5052	ERS1324327	ERR1600132	ERS1939703 (SAMEA104314725)	ERR2135560	HiSeq 2000	279.741	291.558	Cattle mastitis	II	412	CC412	Switzerland
JF5159	ERS1299214	ERR1590258	ERS1939704 (SAMEA104314726)	ERR2135561	HiSeq 2000	120.232	107.993	Sheep brain	I	1	CC1	Switzerland
JF5164			ERS1939705 (SAMEA104314727)	ERR2135562	HiSeq 4000	439.086	451.594	Goat brain	II	11	CC11	Switzerland
JF5171	ERS1324328	ERR1600133	ERS1939706 (SAMEA104314728)	ERR2135563	HiSeq 2000	278.735	294.706	Cattle abortion	II	124	CC124	Switzerland
JF5172	ERS1324329	ERR1600134	ERS1939707 (SAMEA104314729)	ERR2135564	HiSeq 3000	108.221	112.768	Sheep brain	II	16	CC8	Switzerland
JF5181	ERS1299215	ERR1590259	ERS1939708 (SAMEA104314730)	ERR2135565	HiSeq 2000	148.297	133.207	Sheep brain	I	1	CC1	Switzerland
JF5182	ERS1299216	ERR1590260	ERS1939709 (SAMEA104314731)	ERR2135566	HiSeq 2000	310.884	275.217	Cattle abortion	I	1	CC1	Switzerland
JF5183	ERS1299217	ERR1590261	ERS1939710 (SAMEA104314732)	ERR2135567	HiSeq 4000	515.371	470.819	Cattle brain	I	1	CC1	Switzerland
JF5186			ERS1939711 (SAMEA104314733)	ERR2135568	HiSeq 4000	490.907	455.41	Sheep brain	I	54	CC54	Switzerland
JF5191			ERS1939712 (SAMEA104314734)	ERR2135569	HiSeq 4000	491.161	447.926	Cattle brain	I	1	CC1	Switzerland
JF5194	ERS1324330	ERR1600135	ERS1939713 (SAMEA104314735)	ERR2135570	HiSeq 2000	278.677	290.649	Goat brain	II	412	CC412	Switzerland
JF5196			ERS1939714 (SAMEA104314736)	ERR2135571	HiSeq 4000	481.343	446.898	Cattle brain	I	4	CC4	Switzerland
JF5199	ERS1299218	ERR1590262	ERS1939715 (SAMEA104314737)	ERR2135572	HiSeq 2000	116.666	104.889	Cattle brain	I	1	CC1	Switzerland
JF5201	ERS1299219	ERR1590263	ERS1939716 (SAMEA104314738)	ERR2135573	HiSeq 2000	275.619	243.668	Cattle brain	I	1	CC1	Switzerland
JF5203	ERS1299220	ERR1590264	ERS1939717 (SAMEA104314739)	ERR2135574	HiSeq 2000	294.039	254.291	Cattle brain	I	1	CC1	Switzerland
JF5207	ERS1299221	ERR1590265	ERS1939718 (SAMEA104314740)	ERR2135575	HiSeq 4000	467.362	424.966	Cattle brain	I	515	CC1	Switzerland
JF5208	ERS1299222	ERR1590266	ERS1939719 (SAMEA104314741)	ERR2135576	HiSeq 2000	310.168	274.376	Cattle brain	I	1	CC1	Switzerland
JF5210	ERS1299223	ERR1590267	ERS1939720 (SAMEA104314742)	ERR2135577	HiSeq 2000	66.5171	59.4956	Cattle brain	I	1	CC1	Switzerland
JF5213			ERS1939721 (SAMEA104314743)	ERR2135578	HiSeq 4000	443.528	456.348	Goat brain	II	26	CC26	Switzerland
JF5336	ERS1324331	ERR1600136	ERS1939722 (SAMEA104314744)	ERR2135579	HiSeq 2000	585.548	620.195	Cattle abortion	II	18	CC18	Switzerland
JF5337			ERS1939723 (SAMEA104314745)	ERR2135580	HiSeq 2000	269.23	285.817	Environment	II	8	CC8	Switzerland
JF5519			ERS1939724 (SAMEA104314746)	ERR2135581	HiSeq 3000	258.506	240.894	Cattle mastitis	I	4	CC4	Switzerland
JF5541			ERS1939725 (SAMEA104314747)	ERR2135582	HiSeq 4000	468.043	482.698	Sheep brain	II	403	CC403	Switzerland
JF5576			ERS1939726 (SAMEA104314748)	ERR2135583	HiSeq 4000	470.155	480.435	Cattle mastitis	II	412	CC412	Switzerland
JF5577			ERS1939727 (SAMEA104314749)	ERR2135584	HiSeq 3000	284.935	291.19	Goat abortion	II	26	CC26	Switzerland
JF5588			ERS1939728 (SAMEA104314750)	ERR2135585	HiSeq 3000	58.9132	54.0777	Environment	I	1146	ST1146	Switzerland
JF5591			ERS1939729 (SAMEA104314751)	ERR2135586	HiSeq 3000	63.1724	56.752	Environment	I	1	CC1	Switzerland
JF5592			ERS1939730 (SAMEA104314752)	ERR2135587	HiSeq 3000	285.976	280.106	Environment	I	5	CC5	Switzerland
JF5593			ERS1939731 (SAMEA104314753)	ERR2135588	HiSeq 3000	56.1965	56.7164	Environment	II	412	CC412	Switzerland
JF5594			ERS1939732 (SAMEA104314754)	ERR2135589	HiSeq 3000	36.972	34.6665	Environment	I	6	CC6	Switzerland
JF5761	ERS1324336	ERR1600141	ERS1939733 (SAMEA104314755)	ERR2135590	HiSeq 4000	460.272	475.177	Environment	II	37	CC37	Germany
JF5788	ERS1324343	ERR1600148	ERS1939734 (SAMEA104314756)	ERR2135591	HiSeq 4000	465.886	484.66	Environment	II	29	CC29	Switzerland
JF5794	ERS1324344	ERR1600149	ERS1939735 (SAMEA104314757)	ERR2135592	HiSeq 4000	472.185	483.252	Environment	II	226	ST226	Switzerland
JF5809			ERS1939736 (SAMEA104314758)	ERR2135593	HiSeq 4000	459.215	475.147	Environment	II	37	CC37	Switzerland
JF5810			ERS1939737 (SAMEA104314759)	ERR2135594	HiSeq 3000	47.7614	48.8917	Environment	II	26	CC26	Switzerland
JF5822			ERS1939738 (SAMEA104314760)	ERR2135595	HiSeq 3000	284.222	258.808	Cattle brain	I	1	CC1	United Kingdom
JF5823			ERS1939739 (SAMEA104314761)	ERR2135596	HiSeq 3000	270.591	284.689	Cattle abortion	II	91	CC14	United Kingdom
JF5824			ERS1939740 (SAMEA104314762)	ERR2135597	HiSeq 3000	282.841	277.942	Cattle abortion	I	59	CC59	United Kingdom
JF5825			ERS1939741 (SAMEA104314763)	ERR2135598	HiSeq 4000	452.408	470.541	Cattle mastitis	II	20	CC20	United Kingdom
JF5826			ERS1939742 (SAMEA104314764)	ERR2135599	HiSeq 3000	37.5358	39.6507	Cattle abortion	II	7	CC7	United Kingdom
JF5827			ERS1939743 (SAMEA104314765)	ERR2135600	HiSeq 4000	465.331	482.17	Cattle abortion	II	7	CC7	United Kingdom
JF5828			ERS1939744 (SAMEA104314766)	ERR2135601	HiSeq 3000	284.15	295.752	Cattle abortion	II	37	CC37	United Kingdom
JF5829			ERS1939745 (SAMEA104314767)	ERR2135602	HiSeq 3000	290.791	282.337	Cattle abortion	I	59	CC59	United Kingdom
JF5830			ERS1939746 (SAMEA104314768)	ERR2135603	HiSeq 3000	306.132	320.925	Cattle abortion	II	18	CC18	United Kingdom
JF5831			ERS1939747 (SAMEA104314769)	ERR2135604	HiSeq 3000	281.075	298.88	Cattle abortion	II	7	CC7	United Kingdom
JF5832			ERS1939748 (SAMEA104314770)	ERR2135605	HiSeq 3000	305.635	318.121	Goat abortion	II	177	CC177	United Kingdom
JF5833			ERS1939749 (SAMEA104314771)	ERR2135606	HiSeq 3000	340.793	314.415	Goat abortion	I	220	CC220	United Kingdom
JF5861			ERS1939750 (SAMEA104314772)	ERR2135607	HiSeq 4000	499.778	464.529	Human brain	I	4	CC4	Switzerland
LMNC047			ERS1939751 (SAMEA104314773)	ERR2135608	HiSeq 3000	54.7078	50.2701	Cattle brain	I	1	CC1	Switzerland
LMNC051			ERS1939752 (SAMEA104314774)	ERR2135609	HiSeq 3000	350.163	363.223	Cattle brain	II	412	CC412	Switzerland
LMNC055	ERS1324332	ERR1600137	ERS1939753 (SAMEA104314775)	ERR2135610	HiSeq 3000	46.1775	47.0816	Goat brain	II	412	CC412	Switzerland
LMNC060	ERS1299224	ERR1590268	ERS1939754 (SAMEA104314776)	ERR2135611	HiSeq 3000	178.787	171.412	Sheep brain	I	59	CC59	Switzerland
LMNC061			ERS1939755 (SAMEA104314777)	ERR2135612	HiSeq 3000	439.275	400.694	Sheep brain	I	1	CC1	Switzerland
LMNC062			ERS1939756 (SAMEA104314778)	ERR2135613	HiSeq 3000	63.6172	58.2809	Cattle brain	I	1	CC1	Switzerland
LMNC064			ERS1939757 (SAMEA104314779)	ERR2135614	HiSeq 3000	252.768	235.447	Sheep brain	I	4	CC4	Switzerland
LMNC065			ERS1939758 (SAMEA104314780)	ERR2135615	HiSeq 3000	275.609	282.836	Sheep brain	II	206	CC14	Switzerland
LMNC067			ERS1939759 (SAMEA104314781)	ERR2135616	HiSeq 3000	197.372	183.676	Sheep brain	I	4	CC4	Switzerland
LMNC078			ERS1939760 (SAMEA104314782)	ERR2135617	HiSeq 3000	277.699	287.69	Sheep brain	II	18	CC18	Switzerland
LMNC079	ERS1299225	ERR1590269	ERS1939761 (SAMEA104314783)	ERR2135618	HiSeq 3000	528.564	481.198	Goat brain	I	1	CC1	Switzerland
LMNC080			ERS1939762 (SAMEA104314784)	ERR2135619	HiSeq 3000	280.699	291.559	Sheep brain	II	21	CC21	Switzerland
LMNC081	ERS1299226	ERR1590270	ERS1939763 (SAMEA104314785)	ERR2135620	HiSeq 3000	501.045	456.443	Goat brain	I	1	CC1	Switzerland
LMNC083			ERS1939764 (SAMEA104314786)	ERR2135621	HiSeq 3000	279.835	287.775	Sheep brain	II	16	CC8	Switzerland
LMNC085			ERS1939765 (SAMEA104314787)	ERR2135622	HiSeq 3000	283.501	288.902	Goat brain	II	412	CC412	Switzerland
LMNC086			ERS1939766 (SAMEA104314788)	ERR2135623	HiSeq 3000	297.545	277.294	Sheep brain	I	4	CC4	Switzerland
LMNC087			ERS1939767 (SAMEA104314789)	ERR2135624	HiSeq 3000	278.276	290.709	Sheep brain	II	204	CC204	Switzerland
LMNC088	ERS1324333	ERR1600138	ERS1939768 (SAMEA104314790)	ERR2135625	HiSeq 3000	229.82	237.017	Environment	II	412	CC412	Switzerland
LMNC096			ERS1939769 (SAMEA104314791)	ERR2135626	HiSeq 3000	298.034	279.35	Sheep brain	I	6	CC6	Switzerland
LMNC097			ERS1939770 (SAMEA104314792)	ERR2135627	HiSeq 3000	299.903	279.265	Sheep brain	I	4	CC4	Switzerland
LMNC104			ERS1939771 (SAMEA104314793)	ERR2135628	HiSeq 3000	362.247	351.73	Environment	I	1151	CC5	Switzerland
LMNC108			ERS1939772 (SAMEA104314794)	ERR2135629	HiSeq 3000	48.581	47.1908	Human brain	I	5	CC5	Switzerland
LMNC109			ERS1939773 (SAMEA104314795)	ERR2135630	HiSeq 3000	37.5735	36.5021	Environment	I	5	CC5	Switzerland
LMNC112			ERS1939774 (SAMEA104314796)	ERR2135631	HiSeq 3000	349.88	344.786	Food	I	5	CC5	Switzerland
LMNC119			ERS1939775 (SAMEA104314797)	ERR2135632	HiSeq 3000	762.517	739.404	Cattle abortion	I	59	CC59	United Kingdom
LMNC121			ERS1939776 (SAMEA104314798)	ERR2135633	HiSeq 3000	826.312	861.955	Goat brain	II	21	CC21	Switzerland
LMNC142			ERS1939777 (SAMEA104314799)	ERR2135634	HiSeq 3000	572.13	537.051	Sheep enteritis	I	54	CC54	United Kingdom
LMNC146			ERS1939778 (SAMEA104314800)	ERR2135635	HiSeq 3000	55.6223	52.246	Sheep abortion	I	220	CC220	United Kingdom
LMNC148			ERS1939779 (SAMEA104314801)	ERR2135636	HiSeq 3000	1001.04	1035.17	Cattle abortion	II	8	CC8	United Kingdom
LMNC150			ERS1939780 (SAMEA104314802)	ERR2135637	HiSeq 3000	1000.6	1049.16	Sheep abortion	II	18	CC18	United Kingdom
LMNC152			ERS1939781 (SAMEA104314803)	ERR2135638	HiSeq 3000	859.275	801.175	Sheep enteritis	I	220	CC220	United Kingdom
LMNC154			ERS1939782 (SAMEA104314804)	ERR2135639	HiSeq 3000	828.401	846.401	Sheep brain	II	20	CC20	United Kingdom
LMNC155			ERS1939783 (SAMEA104314805)	ERR2135640	HiSeq 3000	878.214	823.195	Sheep abortion	I	6	CC6	United Kingdom
LMNC156			ERS1939784 (SAMEA104314806)	ERR2135641	HiSeq 3000	924.132	952.716	Cattle abortion	II	20	CC20	United Kingdom
LMNC159			ERS1939785 (SAMEA104314807)	ERR2135642	HiSeq 3000	169.73	176.059	Cattle mastitis	II	29	CC29	Switzerland
LMNC160			ERS1939786 (SAMEA104314808)	ERR2135643	HiSeq 3000	162.961	151.819	Sheep abortion	I	219	CC4	Switzerland
LMNC162			ERS1939787 (SAMEA104314809)	ERR2135644	HiSeq 3000	291.054	271.142	Sheep septicemia	I	1146	ST1146	Switzerland
LMNC167			ERS1939788 (SAMEA104314810)	ERR2135645	HiSeq 3000	299.654	279.327	Sheep brain	I	4	CC4	Switzerland
LMNC168			ERS1939789 (SAMEA104314811)	ERR2135646	HiSeq 3000	102.448	95.5906	Sheep brain	I	4	CC4	Switzerland
LMNC169			ERS1939790 (SAMEA104314812)	ERR2135647	HiSeq 3000	301.168	276.096	Goat brain	I	1	CC1	Switzerland
LMNC236	ERS1324302	ERR1600107	ERS1939791 (SAMEA104314813)	ERR2135648	MiSeq	103.972	107.547	Environment	II	37	CC37	Switzerland
LMNC239			ERS1939792 (SAMEA104314814)	ERR2135649	MiSeq	54.5751	56.378	Environment	II	37	CC37	Switzerland
LMNC241	ERS1324303	ERR1600108	ERS1939793 (SAMEA104314815)	ERR2135650	MiSeq	61.7338	63.6714	Environment	II	37	CC37	Switzerland
LMNC244	ERS1324304	ERR1600109	ERS1939794 (SAMEA104314816)	ERR2135651	MiSeq	73.8362	75.8949	Environment	II	399	CC14	Switzerland
LMNC247	ERS1324305	ERR1600110	ERS1939795 (SAMEA104314817)	ERR2135652	MiSeq	57.0943	58.7258	Environment	II	399	CC14	Switzerland
LMNC250	ERS1324334	ERR1600139	ERS1939796 (SAMEA104314818)	ERR2135653	HiSeq 3000	82.4994	84.3447	Environment	II	1159	CC412	Switzerland
LMNC253	ERS1324306	ERR1600111	ERS1939797 (SAMEA104314819)	ERR2135654	MiSeq	54.8157	56.5855	Environment	II	399	CC14	Switzerland
LMNC255			ERS1939798 (SAMEA104314820)	ERR2135655	MiSeq	97.8825	101.156	Environment	II	37	CC37	Switzerland
LMNC257	ERS1324307	ERR1600112	ERS1939799 (SAMEA104314821)	ERR2135656	MiSeq	84.7675	87.3455	Environment	II	399	CC14	Switzerland
LMNC259			ERS1939800 (SAMEA104314822)	ERR2135657	MiSeq	50.2398	52.2448	Environment	II	399	CC14	Switzerland
LMNC264	ERS1324308	ERR1600113	ERS1939801 (SAMEA104314823)	ERR2135658	MiSeq	55.1099	57.7193	Environment	II	37	CC37	Switzerland
LMNC265	ERS1299194	ERR1590238	ERS1939802 (SAMEA104314824)	ERR2135659	MiSeq	62.4888	56.8527	Environment	I	4	CC4	Switzerland
LMNC266	ERS1324309	ERR1600114	ERS1939803 (SAMEA104314825)	ERR2135660	MiSeq	63.1533	66.5573	Environment	II	37	CC37	Switzerland
LMNC269	ERS1324310	ERR1600115	ERS1939804 (SAMEA104314826)	ERR2135661	MiSeq	95.0583	100.503	Environment	II	7	CC7	Switzerland
LMNC270	ERS1324311	ERR1600116	ERS1939805 (SAMEA104314827)	ERR2135662	MiSeq	114.174	118.066	Environment	II	29	CC29	Switzerland
LMNC271	ERS1299195	ERR1590239	ERS1939806 (SAMEA104314828)	ERR2135663	MiSeq	76.0491	70.1795	Sheep brain	I	4	CC4	Switzerland
LMNC273	ERS1324312	ERR1600117	ERS1939807 (SAMEA104314829)	ERR2135664	MiSeq	80.5765	84.5232	Goat brain	II	394	CC415	Switzerland
LMNC274	ERS1299197	ERR1590241	ERS1939808 (SAMEA104314830)	ERR2135665	MiSeq	88.9644	82.8091	Environment	I	4	CC4	Switzerland
LMNC275			ERS1939809 (SAMEA104314831)	ERR2135666	HiSeq 3000	448.529	415.894	Environment	I	4	CC4	Switzerland
LMNC277	ERS1299227	ERR1590271	ERS1939810 (SAMEA104314832)	ERR2135667	HiSeq 3000	133.749	131.461	Environment	I	59	CC59	Switzerland
LMNC278	ERS1299228	ERR1590272	ERS1939811 (SAMEA104314833)	ERR2135668	HiSeq 3000	234.788	220.758	Environment	I	6	CC6	Switzerland
LMNC281	ERS1299229	ERR1590273	ERS1939812 (SAMEA104314834)	ERR2135669	HiSeq 3000	160.79	149.508	Environment	I	4	CC4	Switzerland
LMNC283	ERS1324313	ERR1600118	ERS1939813 (SAMEA104314835)	ERR2135670	MiSeq	80.9344	83.949	Environment	II	36	ST36	Italy
LMNC284	ERS1299198	ERR1590242	ERS1939814 (SAMEA104314836)	ERR2135671	MiSeq	85.3807	80.4978	Environment	I	663	ST663	Italy
LMNC287	ERS1324314	ERR1600119	ERS1939815 (SAMEA104314837)	ERR2135672	MiSeq	75.2804	77.2493	Environment	II	451	CC451	Switzerland
LMNC288	ERS1324315	ERR1600120	ERS1939816 (SAMEA104314838)	ERR2135673	MiSeq	82.8717	85.6779	Environment	II	451	CC451	Switzerland
LMNC297	ERS1324316	ERR1600121	ERS1939817 (SAMEA104314839)	ERR2135674	MiSeq	61.2852	62.7261	Environment	II	394	CC415	Switzerland
LMNC300			ERS1939818 (SAMEA104314840)	ERR2135675	MiSeq	80.6069	75.0126	Environment	I	4	CC4	Switzerland
LMNC301	ERS1324317	ERR1600122	ERS1939819 (SAMEA104314841)	ERR2135676	MiSeq	113.178	117.333	Environment	II	18	CC18	Switzerland
LMNC302	ERS1299199	ERR1590243	ERS1939820 (SAMEA104314842)	ERR2135677	MiSeq	121.837	113.107	Environment	I	1	CC1	Switzerland
LMNC303	ERS1299200	ERR1590244	ERS1939821 (SAMEA104314843)	ERR2135678	MiSeq	135.602	126.97	Environment	I	4	CC4	Switzerland
LMNC304			ERS1939822 (SAMEA104314844)	ERR2135679	MiSeq	121.538	113.112	Environment	I	1	CC1	Switzerland
LMNC305			ERS1939823 (SAMEA104314845)	ERR2135680	MiSeq	114.712	107.361	Environment	I	1	CC1	Switzerland
LMNC306			ERS1939824 (SAMEA104314846)	ERR2135681	MiSeq	62.1874	58.3813	Environment	I	4	CC4	Switzerland
LMNC307	ERS1324318	ERR1600123	ERS1939825 (SAMEA104314847)	ERR2135682	MiSeq	110.126	113.118	Environment	II	11	CC11	Switzerland
LMNC309			ERS1939826 (SAMEA104314848)	ERR2135683	MiSeq	85.4024	87.8875	Environment	II	11	CC11	Switzerland
LMNC314	ERS1324319	ERR1600124	ERS1939827 (SAMEA104314849)	ERR2135684	MiSeq	159.521	166.323	Environment	II	18	CC18	Switzerland
LMNC316	ERS1299201	ERR1590245	ERS1939828 (SAMEA104314850)	ERR2135685	MiSeq	110.866	104.264	Environment	I	4	CC4	Switzerland
LMNC317	ERS1324320	ERR1600125	ERS1939829 (SAMEA104314851)	ERR2135686	MiSeq	96.4311	98.7479	Environment	II	37	CC37	Switzerland
LMNC318	ERS1324346	ERR1600151	ERS1939830 (SAMEA104314852)	ERR2135687	MiSeq	-	-	Environment	III	70	CC70	Germany
LMNC319	ERS1324321	ERR1600126	ERS1939831 (SAMEA104314853)	ERR2135688	MiSeq	101.255	103.669	Environment	II	16	CC8	Germany
LMNC320	ERS1299202	ERR1590246	ERS1939832 (SAMEA104314854)	ERR2135689	MiSeq	73.1942	68.2904	Environment	I	1	CC1	Germany
LMNC321			ERS1939833 (SAMEA104314855)	ERR2135690	MiSeq	73.9484	75.5223	Environment	II	16	CC8	Germany
LMNC322			ERS1939834 (SAMEA104314856)	ERR2135691	MiSeq	71.7387	73.5293	Environment	II	16	CC8	Germany
LMNC323	ERS1324322	ERR1600127	ERS1939835 (SAMEA104314857)	ERR2135692	MiSeq	104.902	106.706	Environment	II	200	ST200	Germany
LMNC325	ERS1324323	ERR1600128	ERS1939836 (SAMEA104314858)	ERR2135693	MiSeq	96.3613	98.8264	Environment	II	204	CC204	Germany
LMNC327	ERS1324324	ERR1600129	ERS1939837 (SAMEA104314859)	ERR2135694	MiSeq	106.18	108.606	Environment	II	16	CC8	Germany
LMNC328	ERS1299230	ERR1590274	ERS1939838 (SAMEA104314860)	ERR2135695	HiSeq 3000	101.867	92.7634	Environment	I	1	CC1	Switzerland
LMNC329			ERS1939839 (SAMEA104314861)	ERR2135696	HiSeq 3000	278.955	252.777	Environment	I	1	CC1	Switzerland
LMNC331	ERS1299231	ERR1590275	ERS1939840 (SAMEA104314862)	ERR2135697	HiSeq 3000	330.844	300.058	Environment	I	1	CC1	Switzerland
LMNC332	ERS1324335	ERR1600140	ERS1939841 (SAMEA104314863)	ERR2135698	HiSeq 3000	156.389	161.077	Environment	II	451	CC451	Switzerland
LMNC333			ERS1939842 (SAMEA104314864)	ERR2135699	HiSeq 3000	277.646	286.18	Environment	II	451	CC451	Switzerland
LMNC336	ERS1299232	ERR1590276	ERS1939843 (SAMEA104314865)	ERR2135700	HiSeq 3000	324.682	300.815	Environment	I	4	CC4	Switzerland
LMNC337	ERS1299233	ERR1590277	ERS1939844 (SAMEA104314866)	ERR2135701	HiSeq 3000	383.223	355.083	Environment	I	4	CC4	Switzerland
LMNC339	ERS1324337	ERR1600142	ERS1939845 (SAMEA104314867)	ERR2135702	HiSeq 3000	278.421	285.732	Environment	II	226	ST226	Switzerland
LMNC340	ERS1324338	ERR1600143	ERS1939846 (SAMEA104314868)	ERR2135703	HiSeq 3000	121.324	124.743	Environment	II	399	CC14	Switzerland
LMNC344			ERS1939847 (SAMEA104314869)	ERR2135704	HiSeq 3000	257.03	264.624	Environment	II	399	CC14	Switzerland
LMNC347			ERS1939848 (SAMEA104314870)	ERR2135705	HiSeq 3000	260.02	267.491	Environment	II	399	CC14	Switzerland
LMNC351	ERS1324339	ERR1600144	ERS1939849 (SAMEA104314871)	ERR2135706	HiSeq 3000	258.391	267.285	Environment	II	11	CC11	Switzerland
LMNC354	ERS1324340	ERR1600145	ERS1939850 (SAMEA104314872)	ERR2135707	HiSeq 3000	53.9581	55.7529	Environment	II	29	CC29	Switzerland
LMNC356			ERS1939851 (SAMEA104314873)	ERR2135708	HiSeq 3000	98.4931	101.904	Environment	II	29	CC29	Switzerland
LMNC357	ERS1299234	ERR1590278	ERS1939852 (SAMEA104314874)	ERR2135709	HiSeq 3000	85.3524	77.6357	Environment	I	1	CC1	Switzerland
LMNC358	ERS1299235	ERR1590279	ERS1939853 (SAMEA104314875)	ERR2135710	HiSeq 3000	702.998	657.331	Environment	I	6	CC6	Switzerland
LMNC359	ERS1324341	ERR1600146	ERS1939854 (SAMEA104314876)	ERR2135711	HiSeq 3000	173.873	177.499	Environment	II	451	CC451	Switzerland
LMNC361	ERS1324342	ERR1600147	ERS1939855 (SAMEA104314877)	ERR2135712	HiSeq 3000	1396.93	1446.27	Environment	II	412	CC412	Switzerland
LMNC368			ERS1939856 (SAMEA104314878)	ERR2135713	HiSeq 3000	272.754	282.486	Environment	II	412	CC412	Switzerland
LMNC369			ERS1939857 (SAMEA104314879)	ERR2135714	HiSeq 3000	273.035	282.596	Environment	II	412	CC412	Switzerland
LMNC374			ERS1939858 (SAMEA104314880)	ERR2135715	HiSeq 3000	78.1	79.9613	Environment	II	226	ST226	Switzerland
LMNC378	ERS1299236	ERR1590280	ERS1939859 (SAMEA104314881)	ERR2135716	HiSeq 3000	197.217	179.497	Goat brain	I	1	CC1	Switzerland
LMNC379	ERS1324345	ERR1600150	ERS1939860 (SAMEA104314882)	ERR2135717	HiSeq 3000	89.4151	91.9838	Goat brain	II	1156	CC37	Switzerland
LMNC380	ERS1299237	ERR1590281	ERS1939861 (SAMEA104314883)	ERR2135718	HiSeq 3000	500.067	454.531	Goat brain	I	1	CC1	Switzerland
LMNC381	ERS1299238	ERR1590282	ERS1939862 (SAMEA104314884)	ERR2135719	HiSeq 3000	63.9348	58.365	Goat brain	I	1	CC1	Switzerland
LMNC382	ERS1299239	ERR1590283	ERS1939863 (SAMEA104314885)	ERR2135720	HiSeq 3000	210.957	192.606	Sheep brain	I	1	CC1	Switzerland
LMNC383	ERS1299240	ERR1590284	ERS1939864 (SAMEA104314886)	ERR2135721	HiSeq 3000	217.944	203.111	Sheep brain	I	4	CC4	Switzerland
LMNC384	ERS1299241	ERR1590285	ERS1939865 (SAMEA104314887)	ERR2135722	HiSeq 3000	472.08	438.608	Sheep brain	I	4	CC4	Switzerland
LMNC409			ERS1939866 (SAMEA104314888)	ERR2135723	HiSeq 3000	45.2943	41.6994	Cattle brain	I	1163	CC1	Switzerland
LMNC410			ERS1939867 (SAMEA104314889)	ERR2135724	HiSeq 3000	206.638	212.421	Cattle brain	II	36	ST36	Switzerland
LMNC411			ERS1939868 (SAMEA104314890)	ERR2135725	HiSeq 4000	494.049	450.737	Cattle brain	I	1	CC1	Switzerland
LMNC412			ERS1939869 (SAMEA104314891)	ERR2135726	HiSeq 4000	453.255	471.701	Cattle brain	II	91	CC14	Switzerland
LMNC413			ERS1939870 (SAMEA104314892)	ERR2135727	HiSeq 3000	301.191	276.412	Cattle brain	I	1	CC1	Switzerland
LMNC414			ERS1939871 (SAMEA104314893)	ERR2135728	HiSeq 3000	304.725	278.044	Cattle brain	I	1	CC1	Switzerland
LMNC415			ERS1939872 (SAMEA104314894)	ERR2135729	HiSeq 4000	452.055	472.168	Cattle brain	II	20	CC20	Switzerland
LMNC416			ERS1939873 (SAMEA104314895)	ERR2135730	HiSeq 3000	301.57	276.176	Cattle brain	I	1163	CC1	Switzerland
LMNC418			ERS1939874 (SAMEA104314896)	ERR2135731	HiSeq 4000	500.159	456.198	Cattle brain	I	10	CC1	Switzerland
LMNC419			ERS1939875 (SAMEA104314897)	ERR2135732	HiSeq 3000	128.785	117.338	Cattle brain	I	1	CC1	Switzerland
LMNC420			ERS1939876 (SAMEA104314898)	ERR2135733	HiSeq 4000	487.77	452.427	Cattle brain	I	4	CC4	Switzerland
LMNC421			ERS1939877 (SAMEA104314899)	ERR2135734	HiSeq 3000	296.521	271.717	Cattle brain	I	1	CC1	Switzerland
LMNC422			ERS1939878 (SAMEA104314900)	ERR2135735	HiSeq 4000	469.678	479.877	Cattle brain	II	412	CC412	Switzerland
LMNC423			ERS1939879 (SAMEA104314901)	ERR2135736	HiSeq 4000	499.245	455.791	Cattle brain	I	1	CC1	Switzerland
LMNC424			ERS1939880 (SAMEA104314902)	ERR2135737	HiSeq 3000	296.041	271.213	Cattle brain	I	1	CC1	Switzerland
LMNC425			ERS1939881 (SAMEA104314903)	ERR2135738	HiSeq 3000	295.582	270.89	Cattle brain	I	1	CC1	Switzerland
LMNC426			ERS1939882 (SAMEA104314904)	ERR2135739	HiSeq 3000	280.457	276.565	Cattle brain	I	59	CC59	Switzerland
LMNC427			ERS1939883 (SAMEA104314905)	ERR2135740	HiSeq 3000	46.269	42.8311	Cattle brain	I	1	CC1	Switzerland
LMNC428			ERS1939884 (SAMEA104314906)	ERR2135741	HiSeq 3000	300.394	274.884	Goat brain	I	1	CC1	Switzerland
LMNC429			ERS1939885 (SAMEA104314907)	ERR2135742	HiSeq 3000	297.723	272.853	Goat brain	I	1	CC1	Switzerland
LMNC431			ERS1939886 (SAMEA104314908)	ERR2135743	HiSeq 3000	275.132	284.544	Goat brain	II	20	CC20	Switzerland
LMNC432			ERS1939887 (SAMEA104314909)	ERR2135744	HiSeq 3000	299.035	274.11	Goat brain	I	1	CC1	Switzerland
LMNC433			ERS1939888 (SAMEA104314910)	ERR2135745	HiSeq 3000	299.613	278.909	Goat brain	I	4	CC4	Switzerland
LMNC434			ERS1939889 (SAMEA104314911)	ERR2135746	HiSeq 3000	225.249	206.632	Goat brain	I	1	CC1	Switzerland
LMNC436			ERS1939890 (SAMEA104314912)	ERR2135747	HiSeq 3000	305.28	278.817	Sheep brain	I	1	CC1	Switzerland
LMNC445			ERS1939891 (SAMEA104314913)	ERR2135748	HiSeq 3000	297.02	271.896	Sheep brain	I	1	CC1	Switzerland
LMNC446			ERS1939892 (SAMEA104314914)	ERR2135749	HiSeq 3000	306.132	279.655	Sheep brain	I	1	CC1	Switzerland
LMNC447			ERS1939893 (SAMEA104314915)	ERR2135750	HiSeq 3000	306.053	279.937	Sheep brain	I	1	CC1	Switzerland
LMNC448			ERS1939894 (SAMEA104314916)	ERR2135751	HiSeq 3000	304.958	278.968	Sheep brain	I	1	CC1	Switzerland
LMNC476			ERS1939895 (SAMEA104314917)	ERR2135752	HiSeq 3000	917.678	966.692	Cattle abortion	II	101	CC101	Switzerland
LMNC477			ERS1939896 (SAMEA104314918)	ERR2135753	HiSeq 3000	66.6153	67.8157	Sheep brain	II	412	CC412	Switzerland
LMNC542			ERS1939897 (SAMEA104314919)	ERR2135754	HiSeq 3000	76.7878	71.541	Sheep brain	I	4	CC4	Switzerland
		*according to http://bigsdb.pasteur.fr/perl/bigsdb/bigsdb.pl?db=pubmlst_listeria_seqdef_public&page=sequenceQuery and Dreyer et al., 2016
		**coverage was calculated based on the reads mapped to the reference genomes JF5203 and JF4839
